# Supplementary material for: In situ selective ligand transformation from Si–H to Si–OH for synergistic assembly of hydrogen-bonded metal–organic frameworks
Source: Royal Society of Chemistry journal article supplement (doi:10.1039/d0ce00629g), 2020-01-01
Supplement: d0ce00629g1.pdf [file d0ce00629g1.pdf]

## ***Supporting Information***

***for***

### ***In Situ Selective Ligand Transformation from Si–H to Si–OH for Synergistic Assembly of Hydrogen-bonded Metal–Organic Frameworks***

Baoling Yuan, Yuan Tang, Gaozhang Gou, Wenyan Dan, Liangchun Li\*

*Shanghai Key Lab of Chemical Assessment and Sustainability, School of Chemical  
Science and Engineering, Tongji University, Shanghai 200092, P. R. China.*

\*Corresponding author. *E-mail address:* [lilc@tongji.edu.cn](mailto:lilc@tongji.edu.cn)

# Content

|                                                                  |            |
|------------------------------------------------------------------|------------|
| <b>General Information .....</b>                                 | <b>S2</b>  |
| <b>Synthesis and Characterization of The Linker.....</b>         | <b>S3</b>  |
| <b>Synthesis and Characterization of MOFs .....</b>              | <b>S6</b>  |
| <b>Methods and Characterizations of The Control Experiments.</b> | <b>S16</b> |
| <b>Reference.....</b>                                            | <b>S19</b> |

## General Information

All manipulations of air- and/or moisture-sensitive compounds were performed either using the standard Schlenk-line technique or in a glove box filled with argon atmosphere. Anhydrous THF, Et<sub>2</sub>O, and hexane were dried by passing through columns of activated alumina and supported copper catalyst supplied by Shanghai MIKROUNA Co., Ltd (SolvPurer A5/G5). Trichlorosilane was distilled over calcium hydride (CaH<sub>2</sub>) prior to use. Other chemicals were used as received.

The single crystal X-ray diffraction analyses of the SiMOF-1 and SiMOF-2 were performed at 293(2) K and 150(2) K, respectively. Reflections were collected on a Bruker APEX II CCD using graphite-monochromated Mo *K*α radiation ( $\lambda = 0.71073$  Å) or Cu *K*α radiation ( $\lambda = 1.54178$  Å). Structures were determined by direct methods and refined by least squares on F<sup>2</sup> using the SHELX suit of programs. Non-hydrogen atoms were refined anisotropically. Hydrogen atoms were constrained in geometrical positions to their parent atoms. The solvated atoms located at the packing cavities of SiMOFs were treated as diffuse contribution to the overall scattering without specific atom positions by SQUEEZE/PLATON.

The nuclear magnetic resonance (NMR) measurements were measured on Bruker AV600 spectrometer (600 MHz for <sup>1</sup>H, 151 MHz for <sup>13</sup>C, and 119 MHz for <sup>29</sup>Si). Powder X-ray diffraction patterns (PXRD) were measured by a D8 ADVANCE (Bruker AXS Inc. Madison, WI, 2001) (Cu *K*α,  $\lambda = 0.15418$  nm) at 45 kV and 40 mA at ambient temperature. Thermal gravimetric analyses (TGA) were carried out on a Perkin-Elmer Pyris 1 instrument, under a constant stream of dry nitrogen gas (flow rate, 20 mL min<sup>-1</sup>) over a temperature range of 22 – 800 °C and at a heating rate of 5 °C min<sup>-1</sup>. The Gas Chromatography–Mass Spectrometry was measured on a GCMS-QP2010 SE, SHIMADZU instrument. Fourier transform infrared (FT-IR) data were collected on a Bruker ALPHA FTIR spectrometer from 400 to 4000 cm<sup>-1</sup> at room temperature.

BET surface area measurements were carried out on a Micromeritics ASAP 2020 instrument. The N<sub>2</sub> sorption isotherms were recorded at 77 K and the CO<sub>2</sub> sorption

isotherms were recorded at 273 K and 298 K, respectively. Generally, prior to the measurements, materials are activated under dynamic vacuum ( $1 \times 10^{-4}$  Pa) using a Micromeritic SmartVacPrep sample preparation unit. The activation procedures are as following: 1) MOFs were collected after filtration and washed by DMF and EtOH for three times respectively. 2) The collected MOFs were soaked in ethanol for 3 d and exchanged with fresh ethanol every day. 3) The ethanol solvent was removed and the MOF crystals were activated at 80 °C under dynamic vacuum ( $1 \times 10^{-4}$  Pa) for 24 h.

## Synthesis and Characterization of The Linker

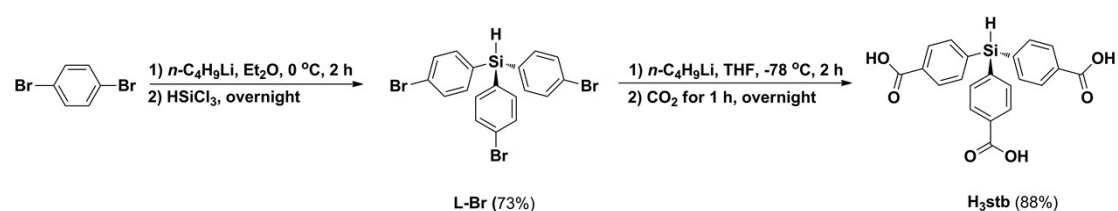

**L-Br (tris(4-bromophenyl)silane)** was synthesized according to the literature.<sup>[1]</sup>

Synthesis of **H<sub>3</sub>stb** (4,4',4''-silanetriyltribenzoic acid)

**4,4',4''-silanetriyltribenzoic acid (H<sub>3</sub>stb)** The synthesis of H<sub>3</sub>stb was carried out under argon atmosphere. To a anhydrous THF solution (100 mL) of L-Br (5.0 g, 10.0 mmol) was added dropwise a *n*-butyllithium solution (2.5 M, 12.0 ml, 30.0 mmol) at -78 °C in 0.5 h. And then the mixture was stirred at this temperature for 1 h. Subsequently the yellow mixture was bubbled with dry CO<sub>2</sub> gas for 1 h and allowed to ambient temperature overnight. The reaction was quenched with water and adjusted the pH to 6 by aqueous HCl (1.0 M). The mixture was then extracted with ethyl acetate (4 × 20 mL). The combined organic layers were dried over MgSO<sub>4</sub> and evaporated to get crude product. The crude product was purified by silica gel column chromatography to afford the pure compound H<sub>3</sub>stb (3.5 g, 88.0 %) as a white solid. <sup>1</sup>H NMR (600 MHz, Methanol-*d*<sub>4</sub>) δ 8.06 (d, J = 8.1 Hz, 6 H), 7.70 (d, J = 8.1 Hz, 6 H), 5.54 (s, 1 H); <sup>13</sup>C NMR (151 MHz, DMSO-*d*<sub>6</sub>) δ 167.31, 141.02, 134.66, 132.14, 128.62.; <sup>29</sup>Si NMR (119 MHz, DMSO-*d*<sub>6</sub>) δ -19.21. IR (cm<sup>-1</sup>): 2667 (w), 2541 (w), 2121 (w), 1684 (s), 1599 (w), 1554 (w), 1418 (m), 1389 (w), 1319 (w), 1286 (s), 1187

(w), 1133 (w), 1101 (m), 1020 (w), 927 (w), 853 (w), 787 (s), 744 (s), 703 (s).

HRMS(ESI):  $m/z[M+Na]^+$  calcd for  $C_{21}H_{16}NaO_6Si$ : 415.0614, found: 415.0608.

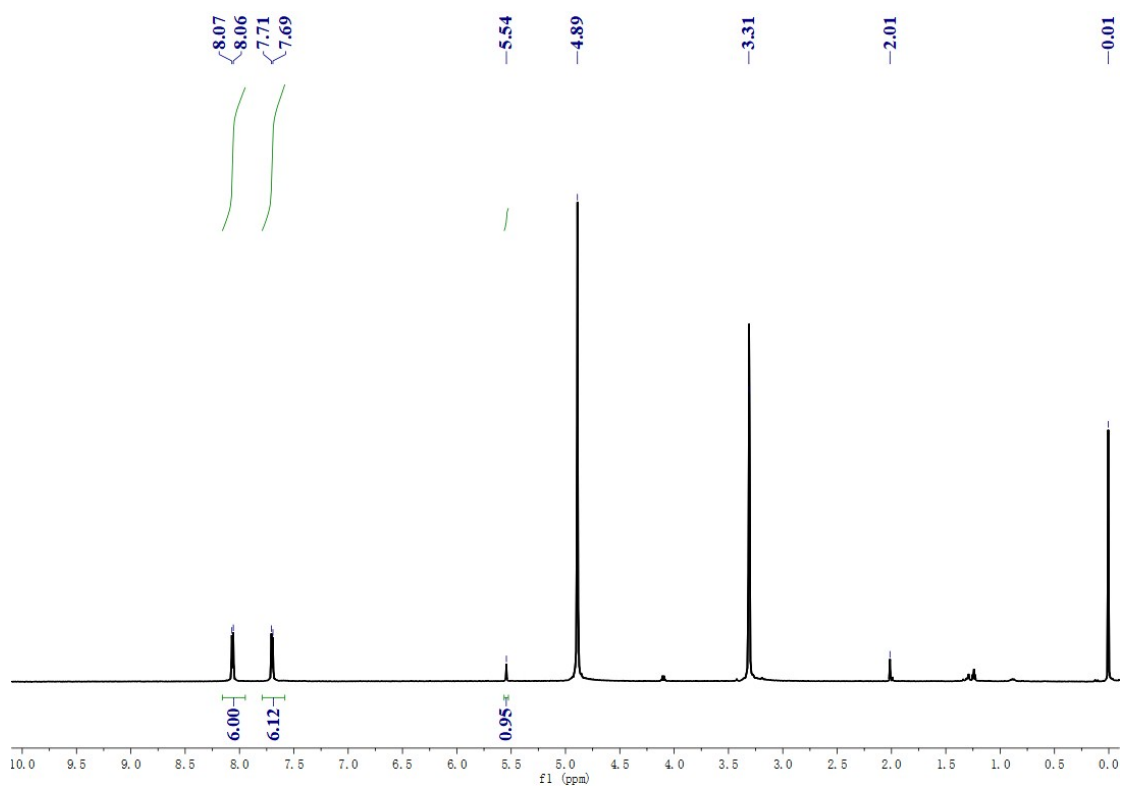

**Figure S1.** The  $^1H$  NMR spectrum of  $H_3stb$  (600 MHz,  $Methanol-d_4$ ).

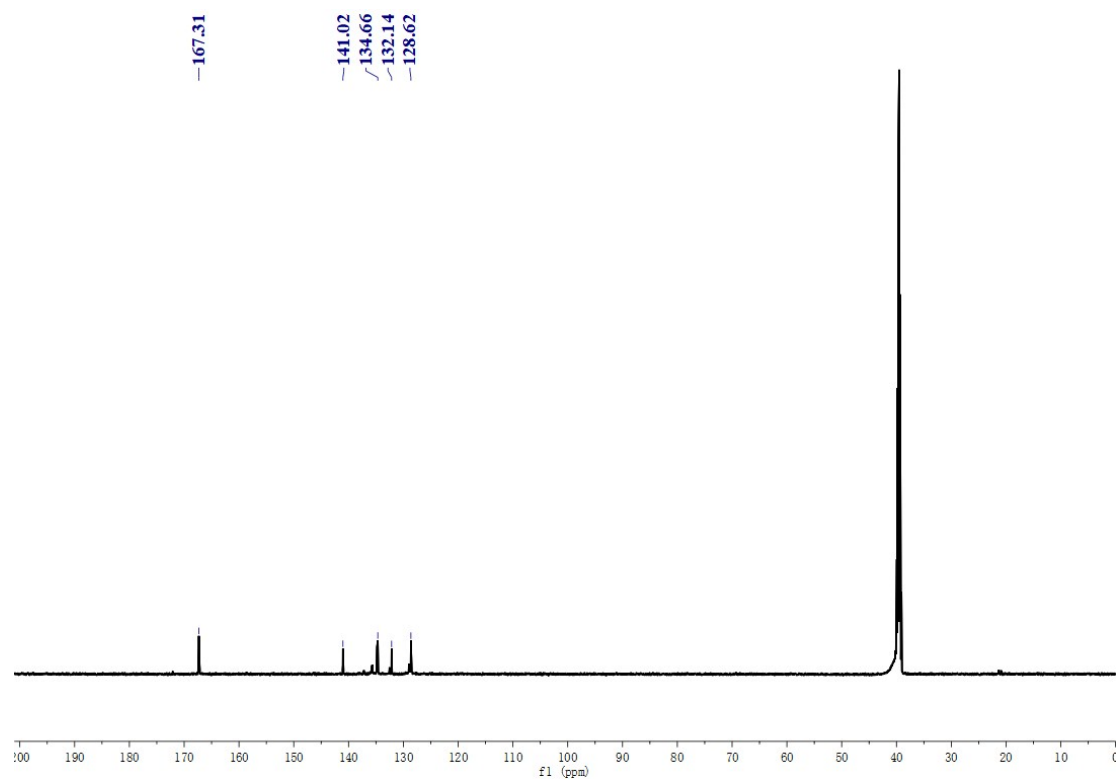

**Figure S2.** The  $^{13}\text{C}$  NMR spectrum of  $\text{H}_3\text{stb}$  (151 MHz,  $\text{DMSO-}d_6$ ).

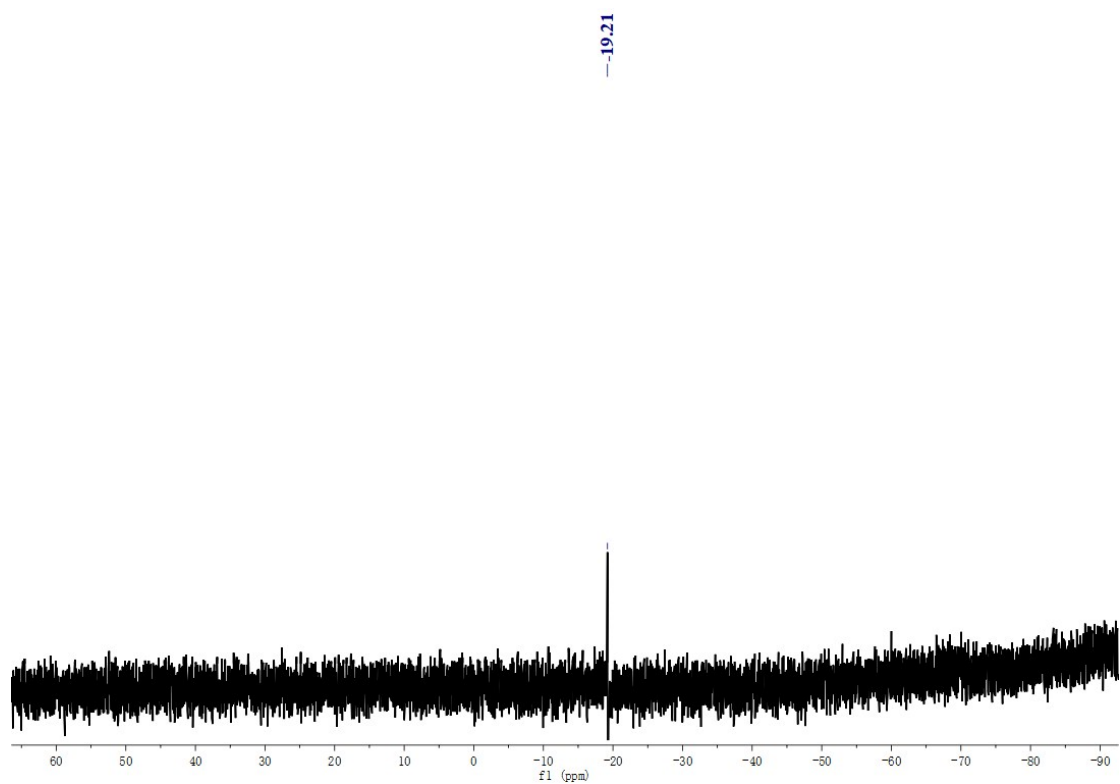

**Figure S3.** The  $^{29}\text{Si}$  NMR spectrum of  $\text{H}_3\text{stb}$  (119 MHz,  $\text{DMSO-}d_6$ ).

## Synthesis and Characterization of MOFs

### Synthesis of SiMOF-1

A mixture of  $\text{Zn}(\text{NO}_3)_2 \cdot 5\text{H}_2\text{O}$  (5.6 mg, 0.020 mmol),  $\text{H}_3\text{stb}$  (4.0 mg, 0.010 mmol), DMF (1 mL),  $\text{H}_2\text{O}$  (100  $\mu\text{L}$ ) and con. HCl (10  $\mu\text{L}$ ) was put in a 5 ml glass tube. And then the sample was heated at 85 °C for 72 h. After cooling to room temperature, colorless crystals were harvested in 45% yield based on Zn. By comprehensive characterizations, the obtained SiMOF-1 was found to be the same as the reported IMP-19 synthesized from the silanol ligand.<sup>[2]</sup>  $^1\text{H}$  NMR (600 MHz, Methanol- $d_4$ ) of the digested SiMOF-1 by DCl (20% in  $\text{D}_2\text{O}$ )  $\delta$  8.08 (d,  $J = 8.1$  Hz, 4 H), 8.04 (d,  $J = 8.1$  Hz, 2 H), 7.72 (d,  $J = 8.1$  Hz, 6 H).

### Synthesis of SiMOF-2

A mixture of  $\text{Mn}(\text{NO}_3)_2 \cdot 4\text{H}_2\text{O}$  (7.0 mg, 0.028 mmol),  $\text{H}_3\text{stb}$  (4.0 mg, 0.010 mmol), DMF (800  $\mu\text{L}$ ), MeOH (1 mL) and con. HCl (10  $\mu\text{L}$ ) was put in a 5 ml glass tube. And then the sample was heated at 85 °C for 72 h, and subsequently cooled to room temperature. Colorless crystals were obtained in 46% yield based on  $\text{H}_3\text{stb}$ . IR ( $\text{cm}^{-1}$ ): 1701 (w), 1598 (m), 1536 (m), 1102 (s), 1018 (w), 878 (w), 726 (s), 703 (m), 485 (m), 423 (m).  $^1\text{H}$  NMR (600 MHz, Methanol- $d_4$ ) of the digested SiMOF-2 by DCl (20% in  $\text{D}_2\text{O}$ )  $\delta$  8.06 (d,  $J = 8.2$  Hz, 2 H), 8.03 (d,  $J = 8.2$  Hz, 4 H), 7.71 (d,  $J = 8.2$  Hz, 6 H).

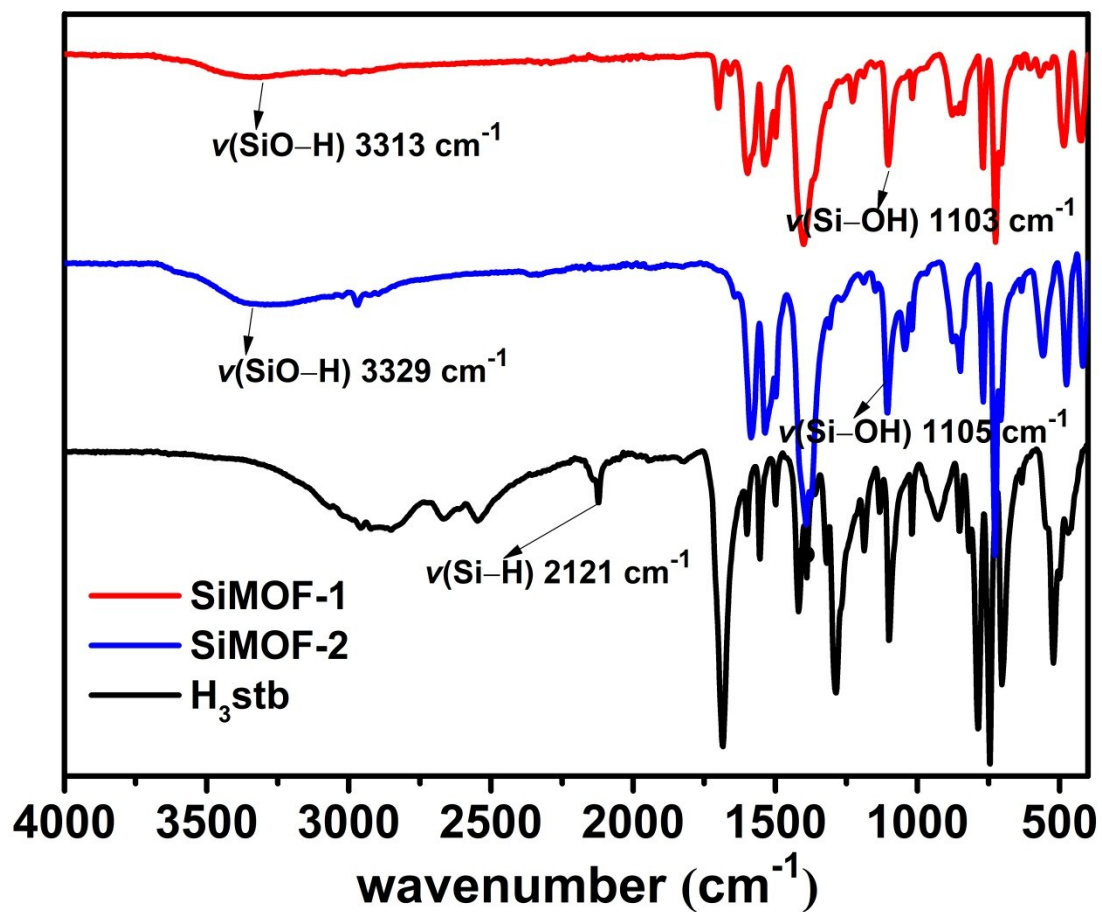

**Figure S4.** The FT-IR spectra of the ligand H<sub>3</sub>stb, SiMOF-1 and SiMOF-2.



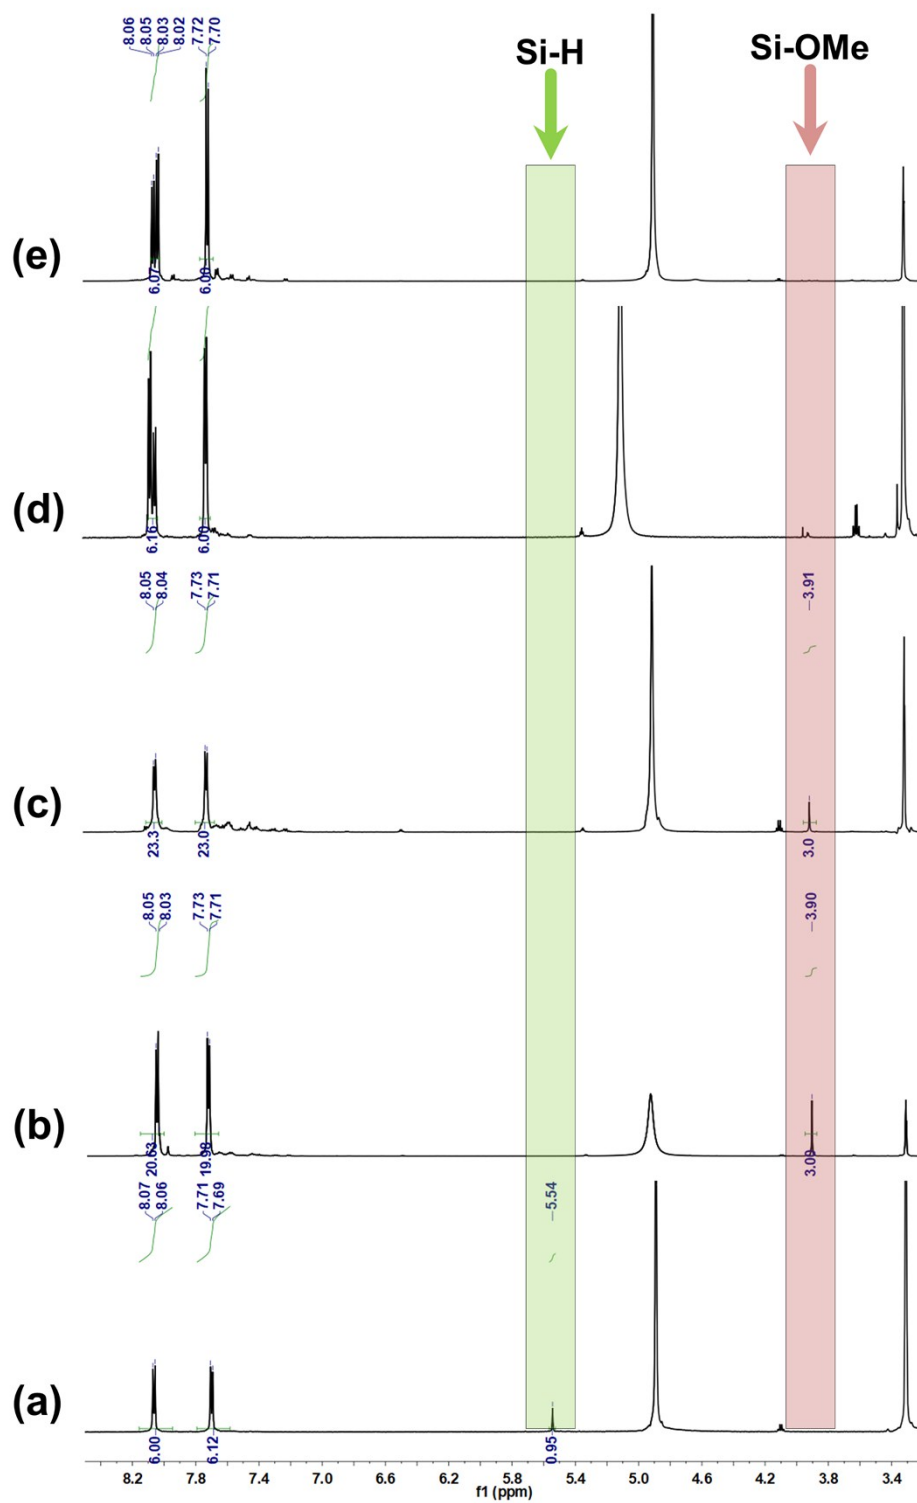

**Figure S5.** The  $^1\text{H}$  NMR spectra of (a) the ligand  $\text{H}_3\text{stb}$ , (b) the mother solution of the solvothermal reaction for SiMOF-1, (c) the mother solution of the solvothermal reaction for SiMOF-2, (d) the digested SiMOF-1 by DCl (20% in  $\text{D}_2\text{O}$ ) and (e) the digested SiMOF-2 by DCl (20% in  $\text{D}_2\text{O}$ ).

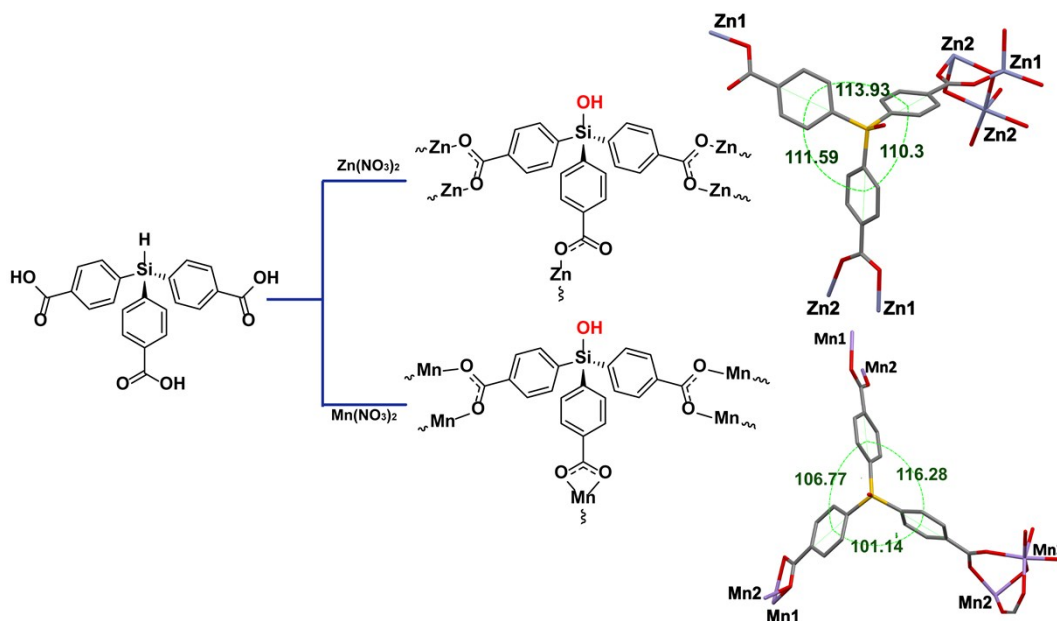

**Figure S6.** The syntheses of SiMOFs by *in situ* transformation from the Si–H to Si–OH ligands. (C, O, and Si, are represented by gray, red, and orange, respectively. H atoms are omitted for clarity).

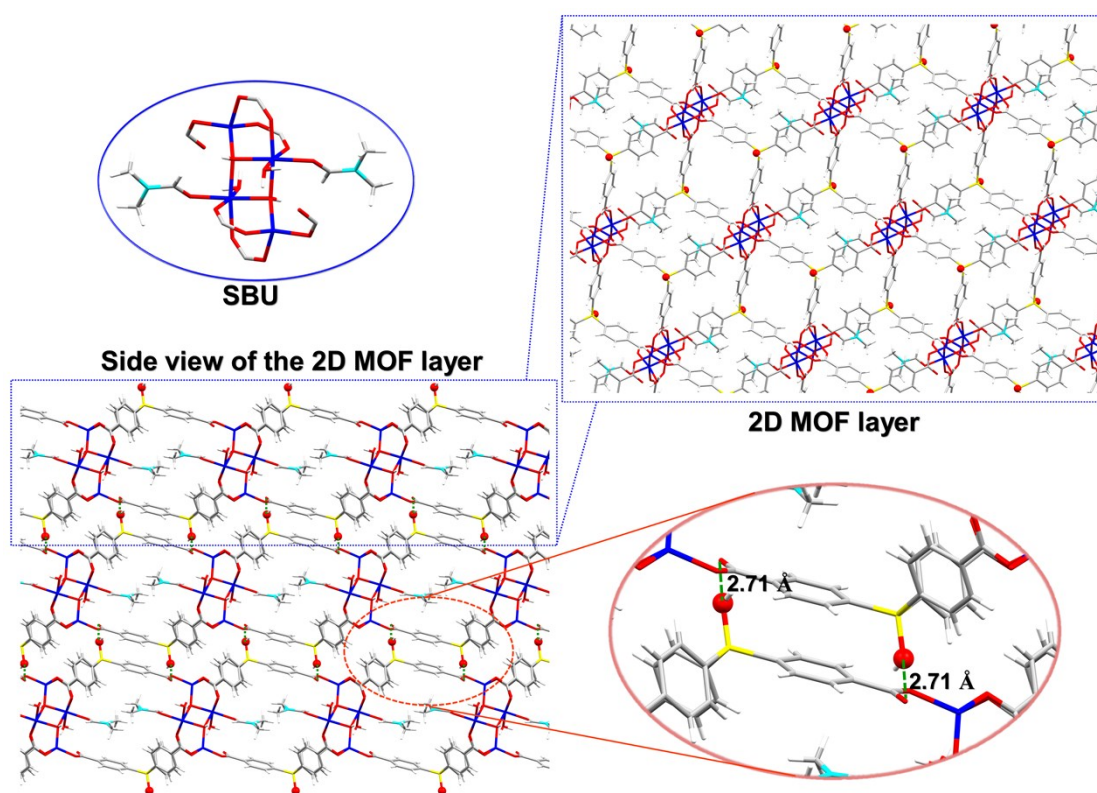

**Figure S7.** The crystal structure details of SiMOF-1.

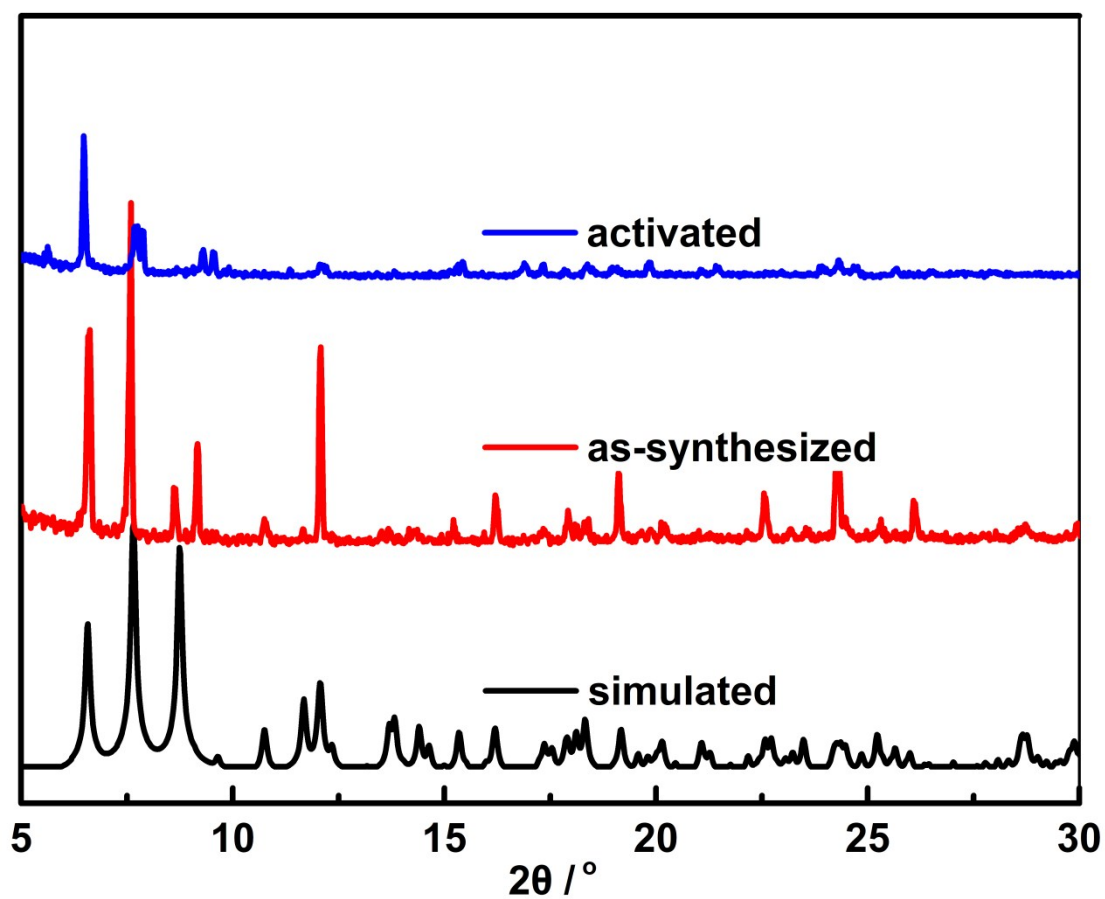

**Figure S8.** The PXR D patterns of the simulated (black), as-synthesized (red) and activated (blue) SiMOF-1.

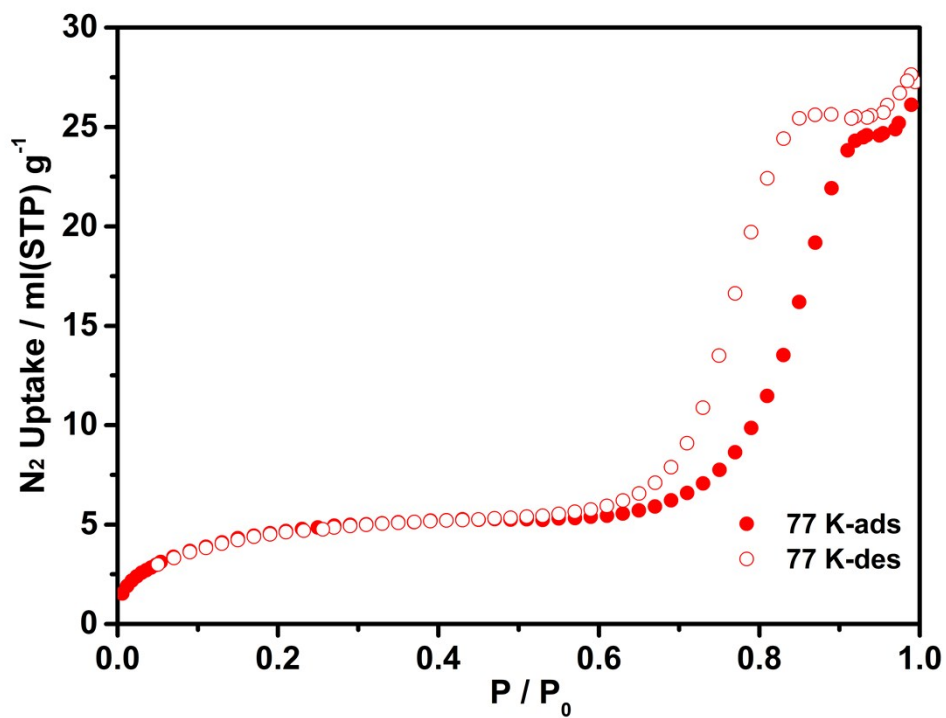

Figure S9. The  $N_2$  sorption isotherm of SiMOF-1 at 77 K.

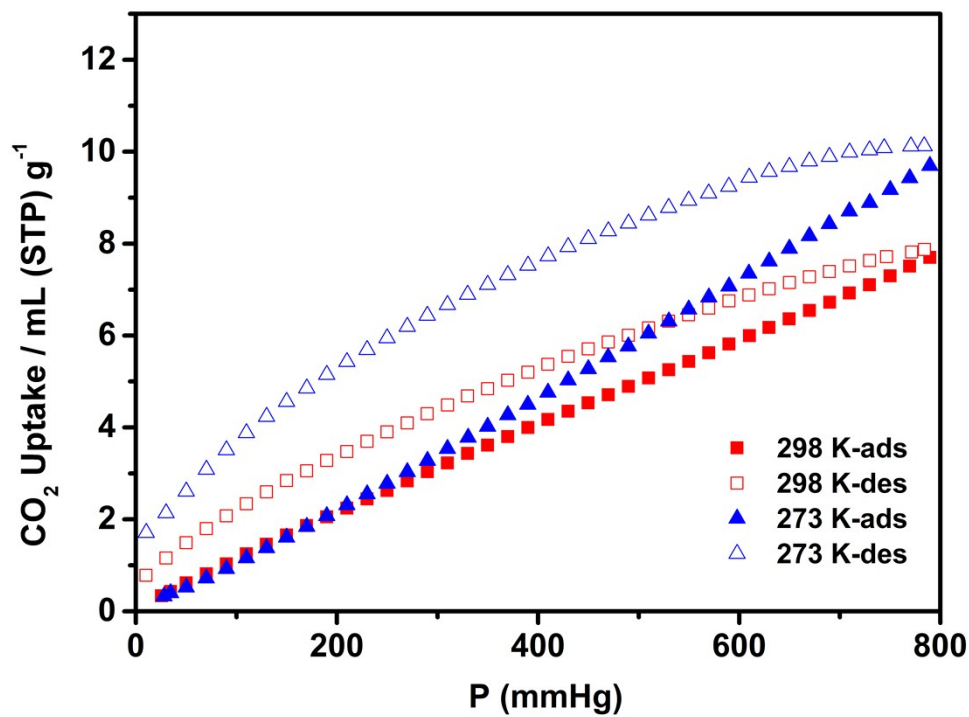

Figure S10. The  $CO_2$  sorption isotherms of SiMOF-1 at 273 K (blue) and 298 K (red).

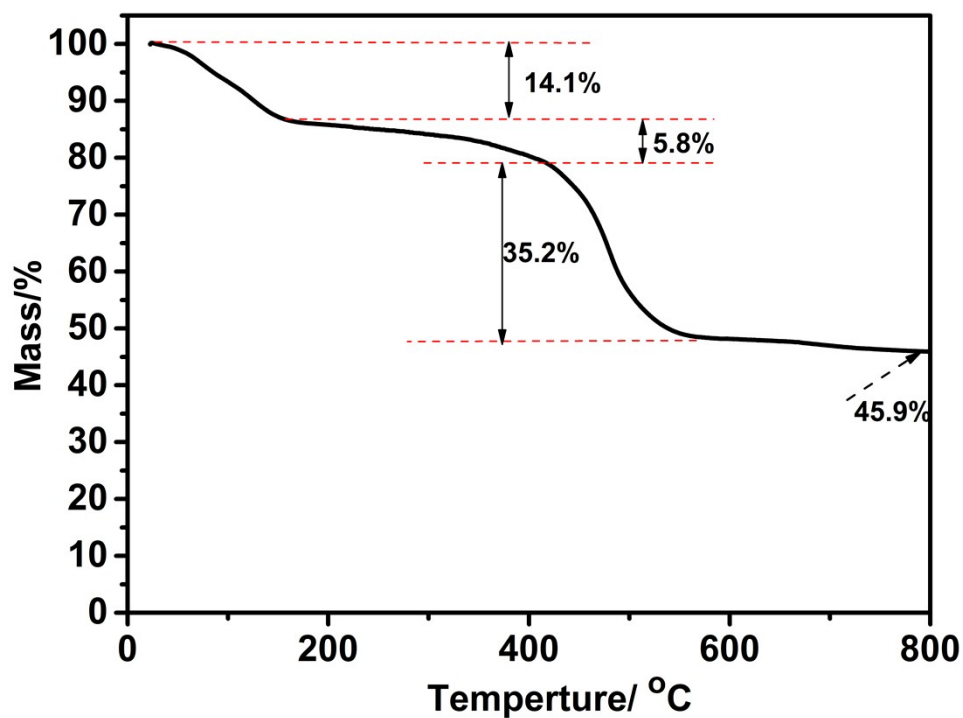

**Figure S11.** The TGA curve of SiMOF-2 under N<sub>2</sub> gas flow.

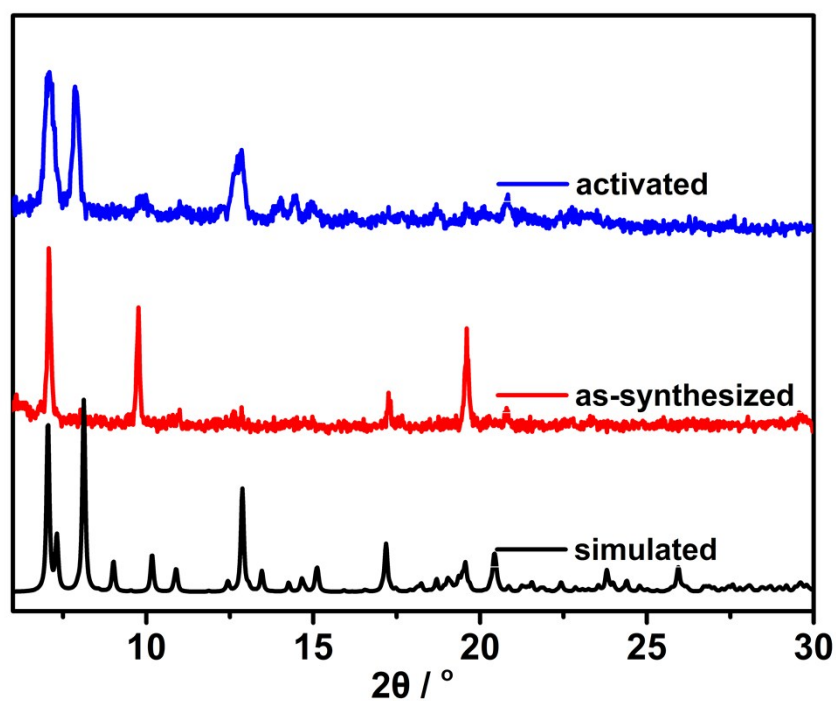

**Figure S12.** The PXRD patterns of the simulated (black), as-synthesized (red) and activated (blue) SiMOF-2 samples.

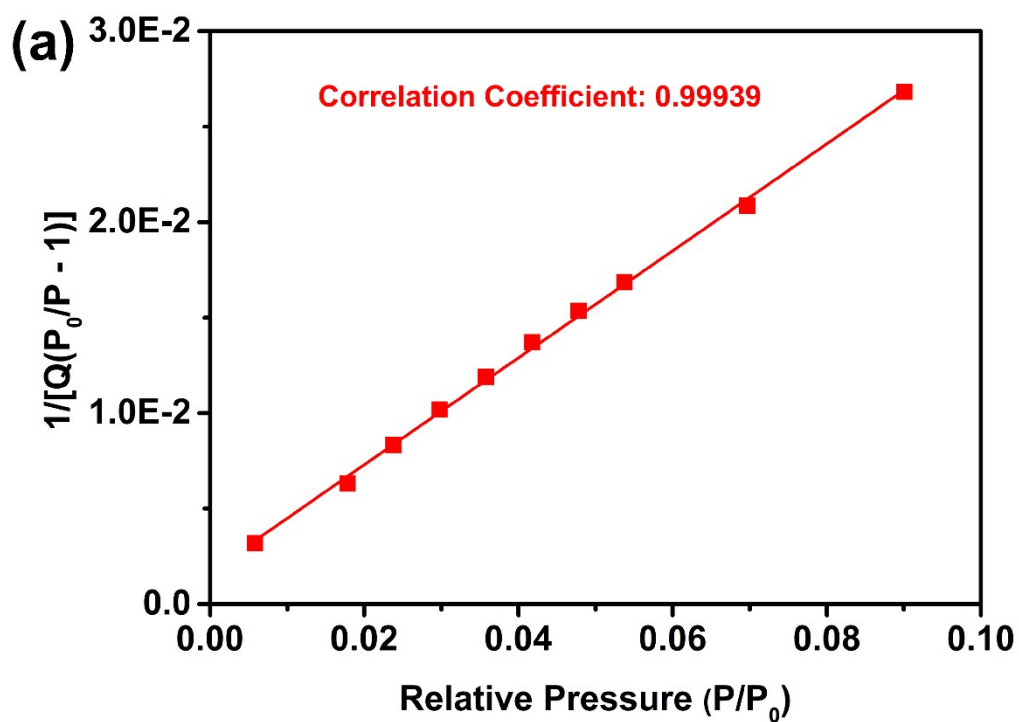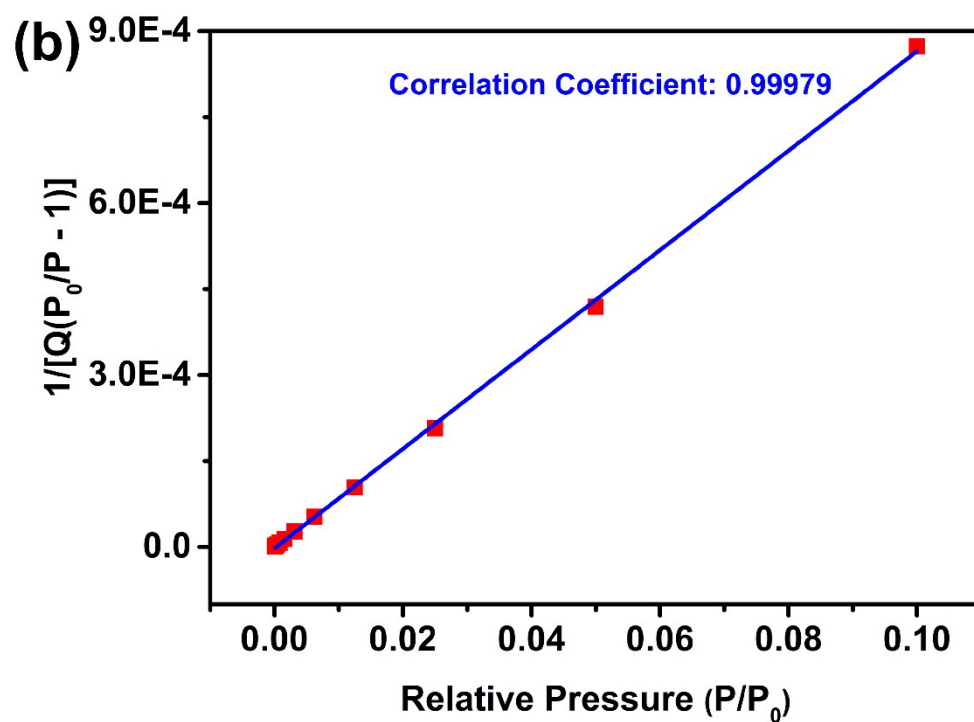

**Figure S13.** The plots for BET surface area calculations of (a) SiMOF-1 and (b) SiMOF-2 in the range ( $P/P_0 = 0.01 - 0.1$ ).

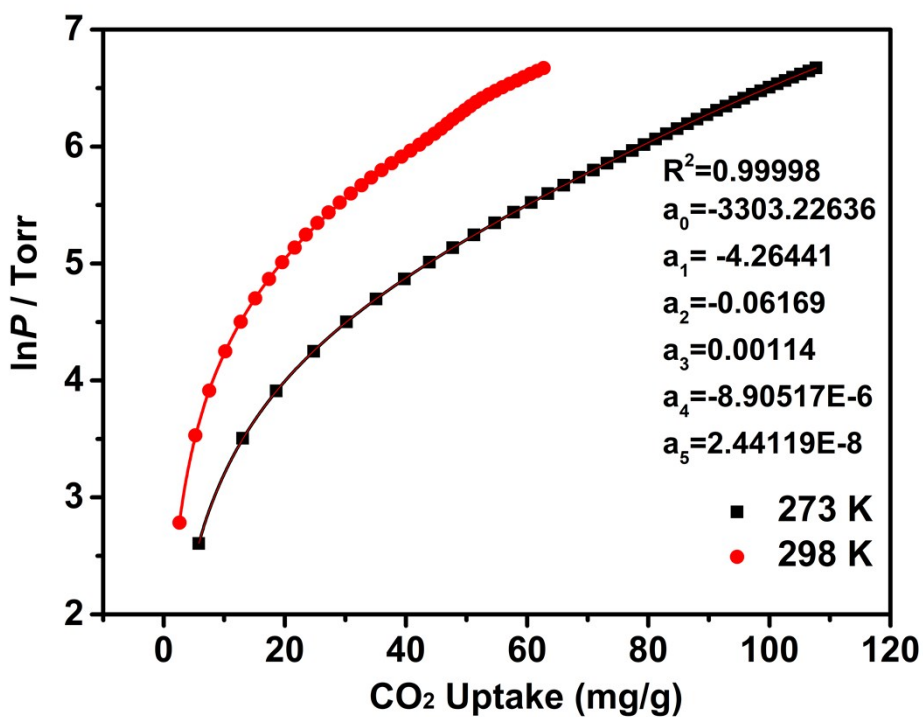

**Figure S14.** The CO<sub>2</sub> isotherms at 273 K and 298 K (symbols) and the virial equation fittings (lines) for SiMOF-2 according to the literature. [3]

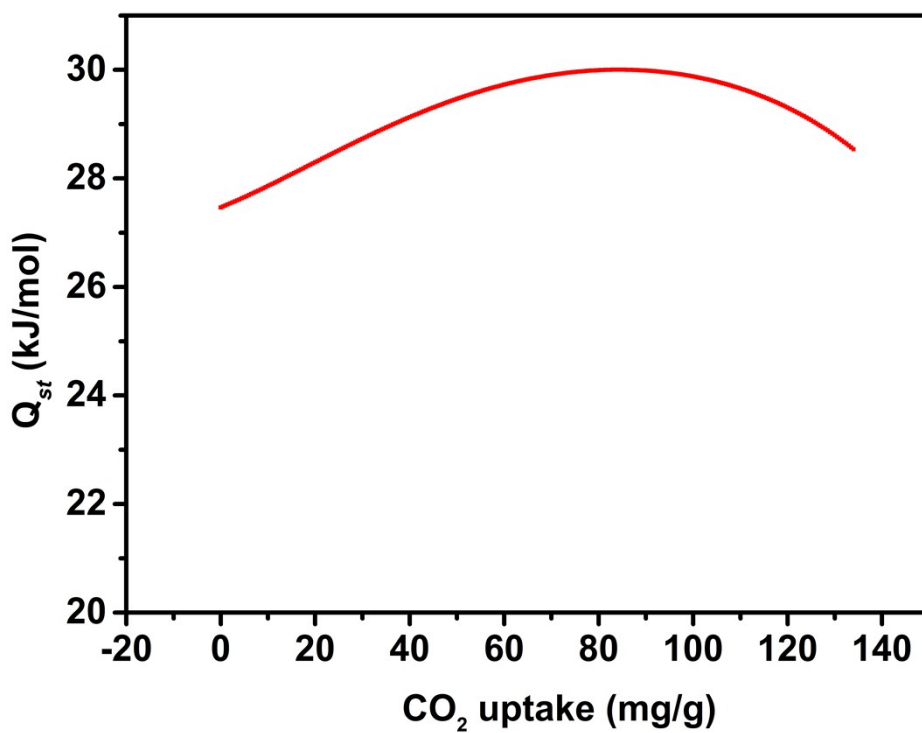

**Figure S15.** The isosteric heats of CO<sub>2</sub> sorption on SiMOF-2.

**Table S1.** The crystal parameters of SiMOF-1 and SiMOF-2.

| <b>Complex</b>                        | <b>SiMOF-1</b>                 | <b>SiMOF-2</b>                 |
|---------------------------------------|--------------------------------|--------------------------------|
| Formula                               | $C_{24}H_{23}NO_{10}SiZn_2$    | $C_{45}H_{39}NO_{18}Si_2Mn_3$  |
| Formula weight                        | 644.30                         | 1102.77                        |
| Temperature (K)                       | 293(2)                         | 150(2)                         |
| Crystal system                        | Triclinic                      | Monoclinic                     |
| Space group                           | P-1                            | P 21/n                         |
| a/Å                                   | 12.513(3)                      | 10.7672(2)                     |
| b/Å                                   | 13.386(3)                      | 25.0553(5)                     |
| c/Å                                   | 14.866(3)                      | 24.4048(5)                     |
| $\alpha/^\circ$                       | 113.61(3)                      | 90.0                           |
| $\beta/^\circ$                        | 91.56(2)                       | 98.310(1)                      |
| $\gamma/^\circ$                       | 106.97(3)                      | 90.0                           |
| $V/\text{Å}^3$                        | 2152.4(9)                      | 6514.7(2)                      |
| Z                                     | 2                              | 4                              |
| $\rho_{\text{calc}}/\text{g cm}^{-3}$ | 0.994                          | 1.124                          |
| F (000)                               | 656                            | 2252                           |
| Crystal size/mm <sup>3</sup>          | $0.40 \times 0.38 \times 0.34$ | $0.26 \times 0.10 \times 0.08$ |
| $R_1/wR_2$ ( $I > 2\sigma$ )          | 0.0612/0.1373                  | 0.0627/0.1393                  |
| $R_1/wR_2$ (all data)                 | 0.0846/0.1464                  | 0.088/0.1497                   |
| Completeness                          | 0.979                          | 0.990                          |
| Goodness-of-fit on $F^2$              | 0.999                          | 1.054                          |



## Methods and Characterizations of The Control Experiments

Entry 1 – 4: A mixture of  $\text{Zn}(\text{NO}_3)_2 \cdot 5\text{H}_2\text{O}$  (0.020 mmol, 5.6 mg) or  $\text{Mn}(\text{NO}_3)_2 \cdot 4\text{H}_2\text{O}$  (0.028 mmol, 7.0 mg),  $\text{HSiPh}_3$  (0.01 mmol, 2.6 mg), DMF (0.8 mL) MeOH (1 mL) with/without HCl (con., 10  $\mu\text{L}$ ) was charged into a 8 ml glass tube. The mixture was heated at 85  $^\circ\text{C}$  for 72 h, and allowed to room temperature. After evaporation of the solvent,  $\text{H}_2\text{O}$  was added and extracted with  $\text{CH}_2\text{Cl}_2$  ( $3 \times 2$  mL). The combined organics were washed with brine and dried over  $\text{Na}_2\text{SO}_4$ . After the solvent was removed, the mixture was analyzed by GC-MS.

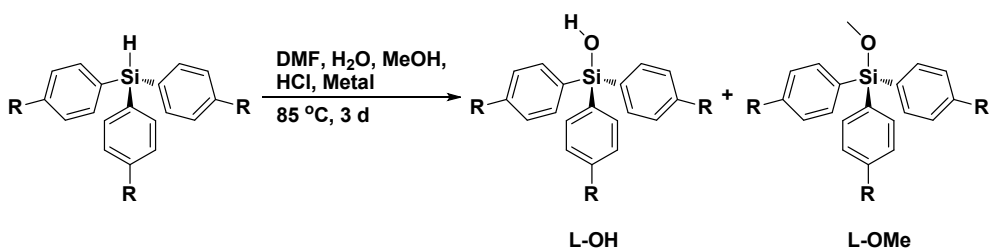

| Entry | Compound(L)      | Metal                      | HCl ( $\mu\text{L}$ ) |
|-------|------------------|----------------------------|-----------------------|
| 1     | $\text{HSiPh}_3$ | $\text{Zn}(\text{NO}_3)_2$ | 0                     |
| 2     | $\text{HSiPh}_3$ | $\text{Mn}(\text{NO}_3)_2$ | 0                     |
| 3     | $\text{HSiPh}_3$ | $\text{Zn}(\text{NO}_3)_2$ | 10                    |
| 4     | $\text{HSiPh}_3$ | $\text{Mn}(\text{NO}_3)_2$ | 10                    |

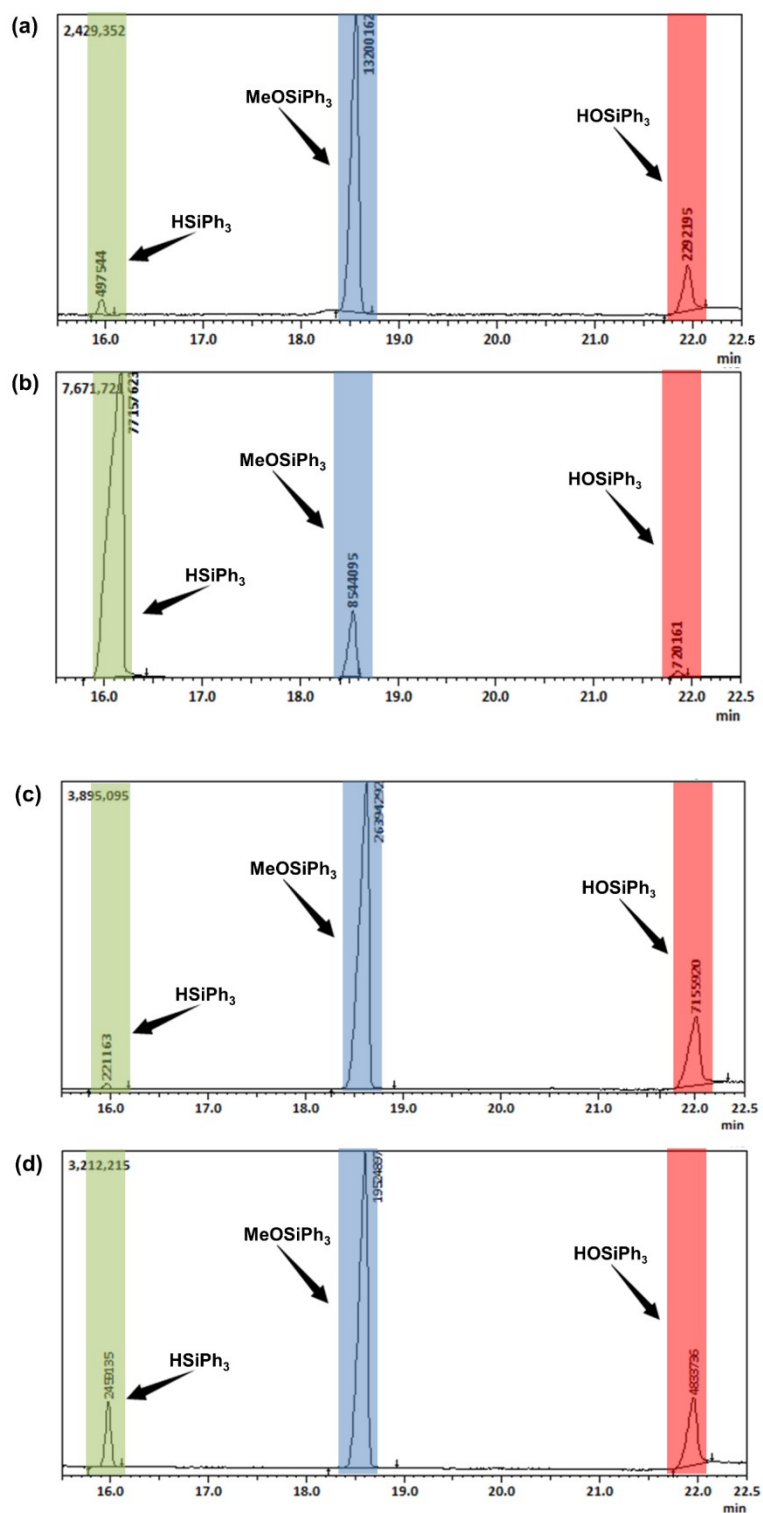

**Figure S16.** The GC spectra of the control experiments. (a) Entry 1. (b) Entry 2. (c) Entry 3. (d) Entry 4. There are three compounds ( $\text{HSiPh}_3$ ,  $\text{MeOSiPh}_3$ ,  $\text{HOSiPh}_3$ ) in the reaction mixture and their retention times are 16.60 min, 18.63 min and 21.99 min, respectively.

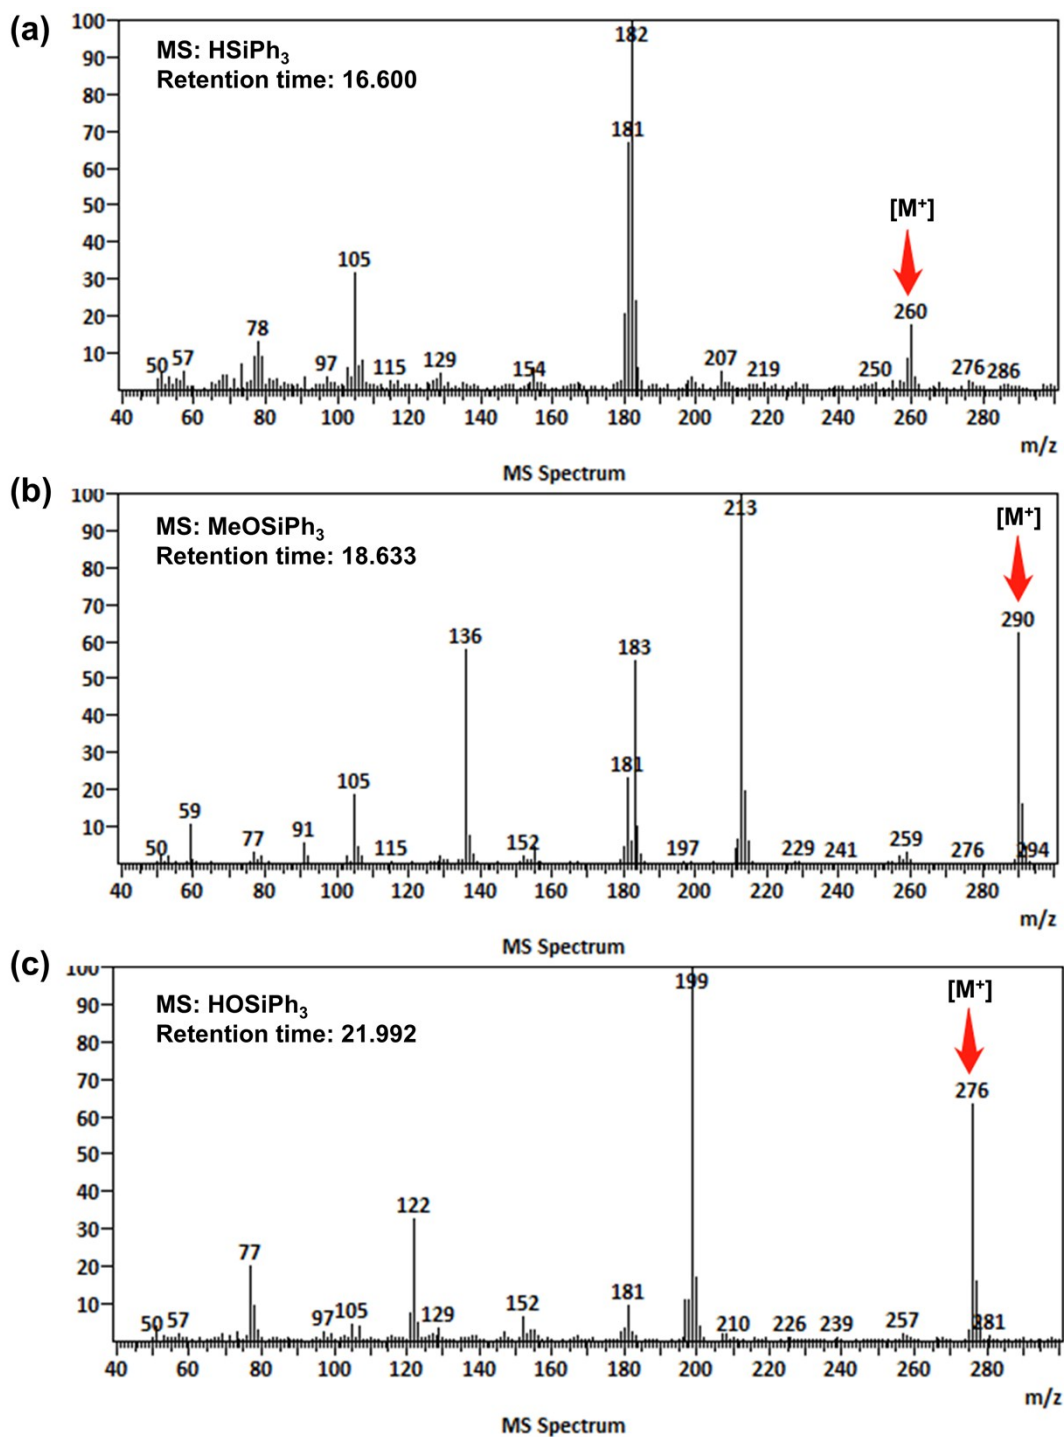

**Figure S17.** The Mass Spectra at the corresponding retention times for characterization of the compounds HSiPh<sub>3</sub>, MeOSiPh<sub>3</sub>, HOSiPh<sub>3</sub>.

## Reference

- [1] Wander, M.; Hausoul, P. J. C.; Sliedregt, L. A. J. M.; Van Steen, B. J.; Van Koten, G.; Gebbink, R. J. M. K., Synthesis of Polyaryl Rigid-Core Carbosilane Dendrimers for Supported Organic Synthesis. *Organometallics* **2009**, *28*, 4406–4415.
- [2] Delmas, L. C.; Horton, P. N.; White, A. J. P.; Coles, S. J.; Lickiss, P. D.; Davies, R. P., Siloxane-based linkers in the construction of hydrogen bonded assemblies and porous 3D MOFs. *Chem. Commun.* **2017**, *53*, 12524–12527.
- [3] Zheng, B.; Bai, J.; Duan, J.; Wojtas, L.; Zaworotko, M. J., Enhanced CO<sub>2</sub> Binding Affinity of a High-Uptake *rht*-Type Metal–Organic Framework Decorated with Acylamide Groups. *J. Am. Chem. Soc.* **2011**, *133*, 748–751.
